# Supplementary material for: Synthesis of fluorescent polymeric carbon nitride quantum dots in molten salts for security inks
Source: Royal Society of Chemistry journal article supplement (doi:10.1039/c7nj03423g), 2017-01-01
Supplement: c7nj03423g1.pdf [file c7nj03423g1.pdf]

## Supporting Information

### **Synthesis of fluorescent polymeric carbon nitride quantum dots in molten salts for security ink**

Yaping Wang,<sup>ab</sup> Jianshe Wang,<sup>\*a</sup> Panpan Ma,<sup>a</sup> Hongchang Yao,<sup>a</sup> Lin Zhang<sup>a</sup> and Zhongjun Li <sup>\*a</sup>

<sup>a</sup> College of Chemistry and Molecular Engineering, Zhengzhou University, No.100  
Science Avenue, Zhengzhou 450001, P. R. China

<sup>b</sup> College of Chemistry and Chemical Engineering, Zhengzhou Normal University,  
No.6 yingcai Road, Zhengzhou 450044, P. R. China

\*Corresponding author.E-mail address: jianshewang@zzu.edu.cn, lizhongjun@zzu.  
edu.cn.

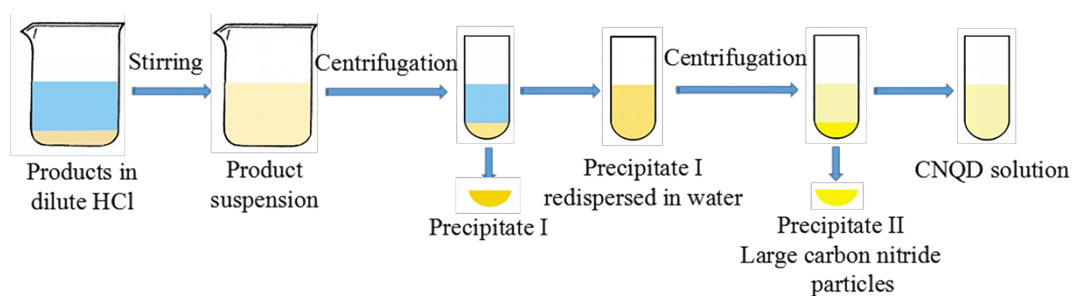

**Scheme S1.** Schematic illustration of the separation process of CNQDs and product labeling

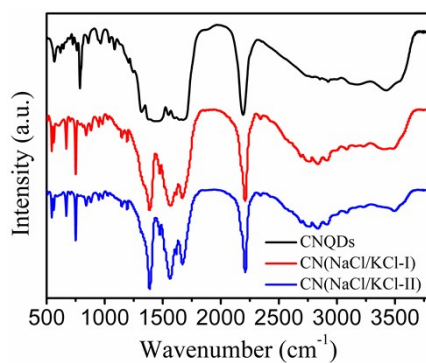

**Figure S1** FTIR spectra of CN(NaCl/KCl-I), CN(NaCl/KCl-II) and CNQDs.

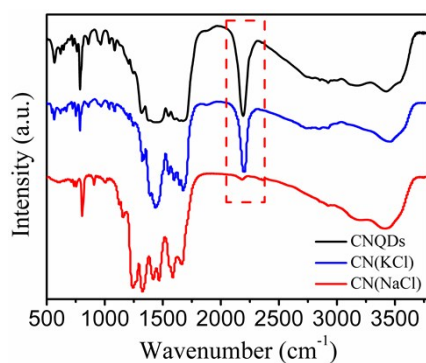

**Figure S2** FTIR spectra of CN(NaCl), CN(KCl) and CNQDs.

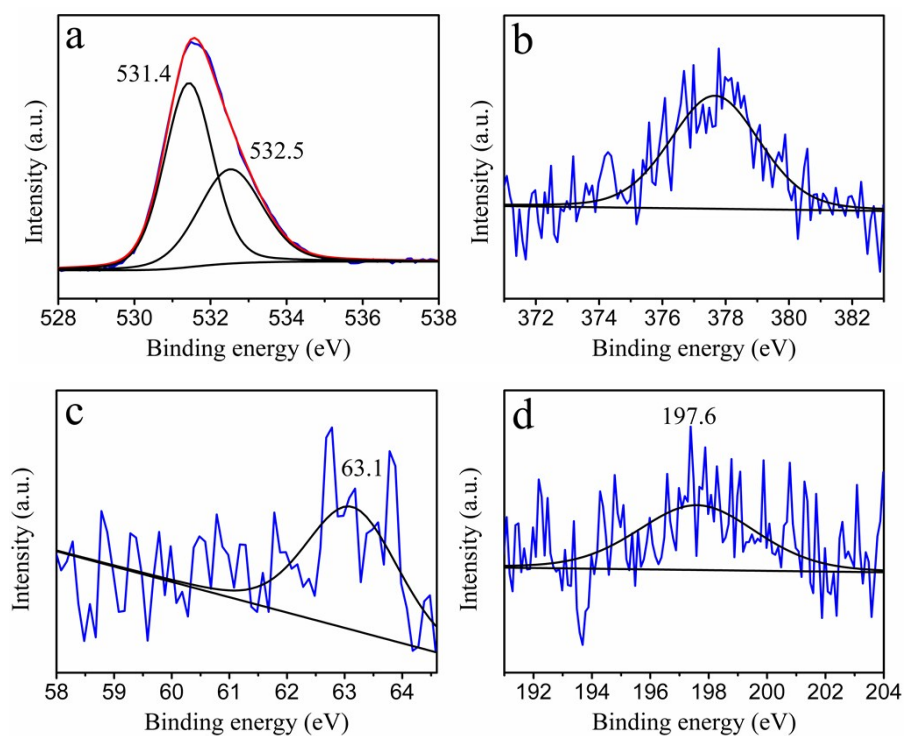

**Figure S3.** (a) High resolution O 1s, (b) K 2s, (c) Na 2s and (d) Cl 2p XPS spectra of CNQDs.

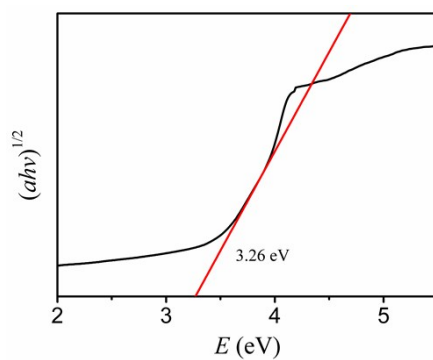

**Figure S4.** Kubelka-Munk function plot of CNQDs.

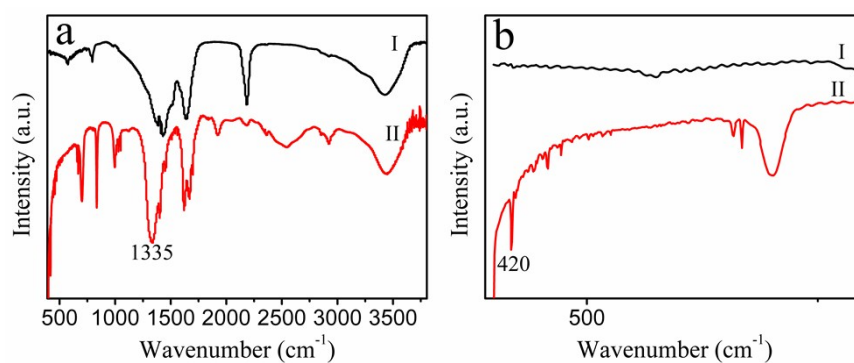

**Figure S5.** (a) FTIR spectra of the substances in the mixture of CNQDs,  $\text{CuCl}_2$  and  $\text{NaHCO}_3$ . (b) The enlarged plots of FTIR spectra of the substances in the mixture of CNQDs,  $\text{CuCl}_2$  and  $\text{NaHCO}_3$ . (I: the substances in the mixture of CNQDs and  $\text{CuCl}_2$ ; II: the substances in the mixture of CNQDs,  $\text{CuCl}_2$  and  $\text{NaHCO}_3$ ).
